# Supplementary material
Source: PubMed Central journal article supplement (PMC4089009)
Supplement: mt201462x1.pdf [file mt201462x1.pdf]

Supplementary Material for

**Inflammation converts human mesoangioblasts into  
targets of alloreactive immune responses: implications  
for allogeneic cell therapy of DMD**

Maddalena Noviello<sup>1</sup>; Francesco Saverio Tedesco<sup>2</sup>; Attilio Bondanza<sup>1</sup>; Rossana Tonlorenzi<sup>3</sup>; Maria Rosaria Carbone<sup>1</sup>, Mattia Gerli<sup>2</sup>; Sarah Markt<sup>4</sup>; Sara Napolitano<sup>4</sup>; Maria Pia Cicalese<sup>4</sup>; Fabio Ciceri<sup>4</sup>; Giuseppe Peretti<sup>5</sup>; Giulio Cossu<sup>6</sup>; Chiara Bonini<sup>1</sup>.

\*Corresponding author: Dr Chiara Bonini, e-mail: [bonini.chiara@hsr.it](mailto:bonini.chiara@hsr.it).

**This file includes:**

Supplementary Figure 1

Supplementary Figure 2

Supplementary Table 1

Supplementary Figure 1

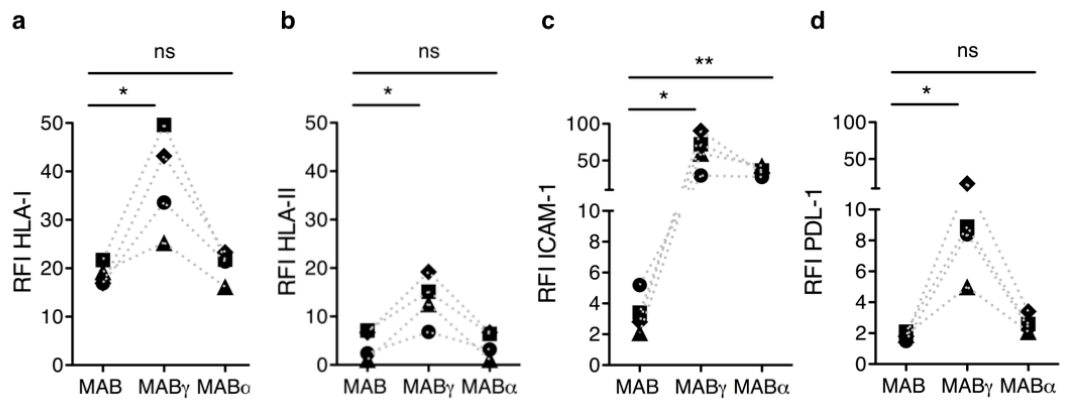

**SUPPLEMENTARY FIGURE 1. IFN- $\gamma$  and TNF- $\alpha$  treatment of MAB results in upregulation of molecules involved in the immunological synapse.** The levels of expression of HLA class I (**a**), HLA class II (**b**), ICAM-1 (**c**) and PDL-1 (**d**) was quantified by cytofluorimetric analysis on mesoangioblasts untreated (MAB), treated with IFN- $\gamma$  (MAB $\gamma$ ) or treated with TNF- $\alpha$  (MAB $\alpha$ ). Relative fluorescence intensity (RFI) was measured as the ratio of the mean fluorescence intensity (MFI) of specific markers to the MFI of isotype controls. Each symbol represents the RFI of HLA class I, HLA class II, ICAM-1 and PDL-1 in individual donors. Cells harvested from individual donors are represented in all plots by the same symbol.

\*p<0.05; \*\*p<0.01.

## Supplementary Figure 2

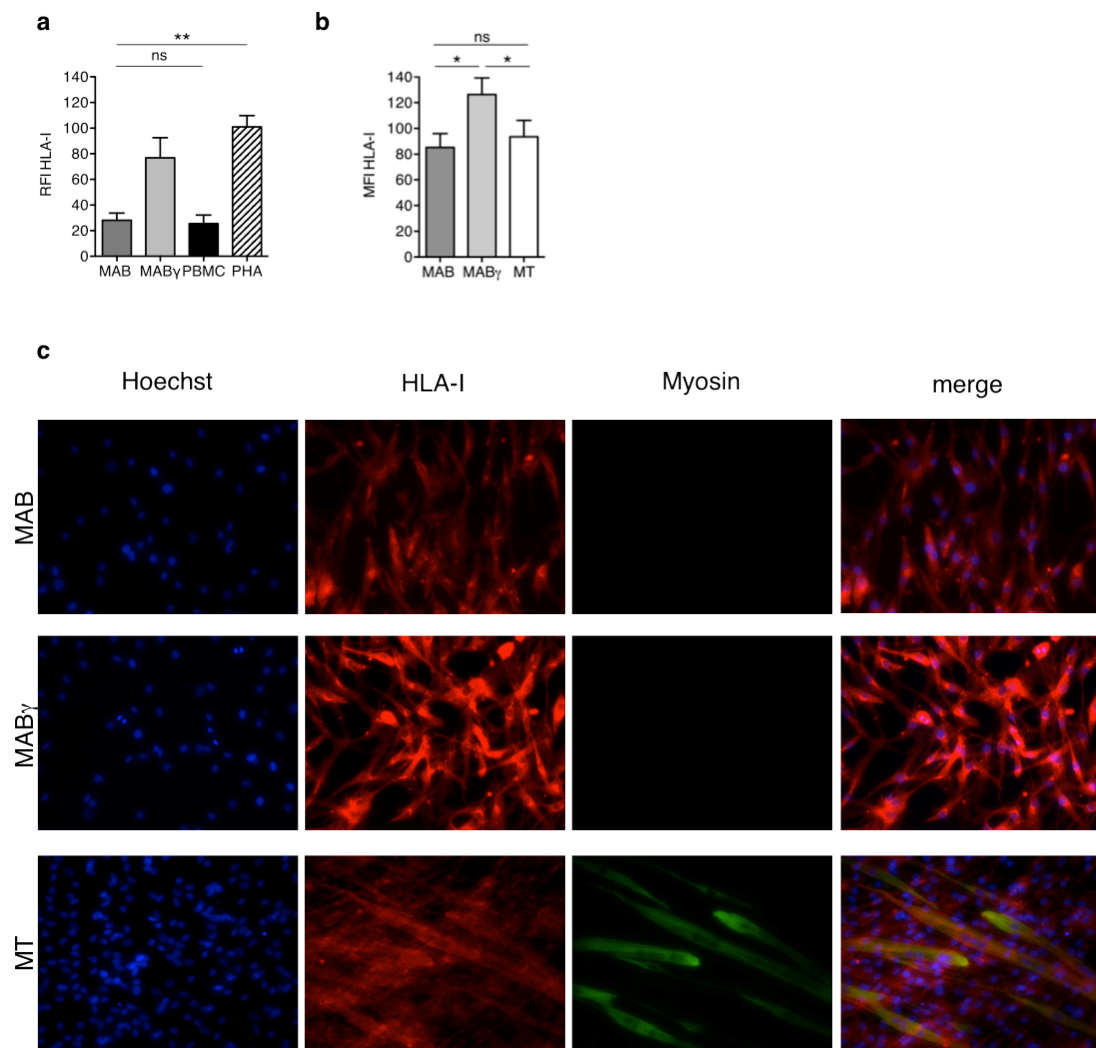

**SUPPLEMENTARY FIGURE 2. Levels of expression of HLA class I on target cells.** (a) The level of expression of HLA class I was measured on mesoangioblasts untreated (MAB) or treated with IFN- $\gamma$  (MAB $\gamma$ ), PBMC and PHA T-cell lines (PHA) by FACS analysis. Relative fluorescence intensity (RFI) was measured as the ratio of the mean fluorescence intensity (MFI) of specific markers to the MFI of isotype controls. Averages + SEM are shown. N=4 (b) The level of expression of HLA class I was measured on MAB, MAB $\gamma$  and myotubes differentiated from MAB (MT) by immunofluorescence for myosin heavy chain (green), HLA-I (red) and Hoechst (blue). Averages of mean fluorescence intensity (MFI) + SEM are shown. N=3 (c) Results from a representative experiment are shown.

\*p<0.05; \*\*p<0.01.

**Supplementary Table 1. Immunological characterization of untreated, IFN- $\gamma$  treated and TNF $\alpha$  treated mesoangioblasts.**

| Function                | Marker | MAB (RFI) <sup>a</sup> | MAB $\gamma$ (RFI) <sup>a</sup>   | MAB $\alpha$ (RFI) <sup>a</sup> |
|-------------------------|--------|------------------------|-----------------------------------|---------------------------------|
| HLA MOLECULES           | HLA-I  | 20.5<br>(11.6-80.6)    | 64.8<br>(23.3-220.4) <sup>d</sup> | 21.6<br>(16.2-23.3)             |
|                         | HLA-II | 2.1<br>(0.7-79.5)      | 16.0<br>(1.8-276.5) <sup>d</sup>  | 4.8<br>(1.1-6.7)                |
| COSTIMULATORY MOLECULES | CD80   | 1.0 (0.5-1.1)          | 0.9 (0.8-1.3)                     | 0.9 (0.9-1.0)                   |
|                         | CD86   | 1.0 (0.9-1.2)          | 1.0 (0.8-1.3)                     | 1.0 (0.9-1.1)                   |
|                         | CD70   | 1.0 (0.5-1.5)          | 1.0 (0.3-1.3)                     | 1.0 (0.9-1.2)                   |
|                         | CD40   | 1.0 (0.6-1.3)          | 1.0 (0.7-1.2)                     | 1.1 (0.9-1.2)                   |
|                         | PDL-1  | 1.7 (1.0-2.1)          | 4,5 (0.5-16.7) <sup>b</sup>       | 2.5 (2.1-3.4)                   |
| ADHESION MOLECULES      | ICAM-1 | 2.6 (1.0-5.8)          | 39.2 (1.6-90.5) <sup>d</sup>      | 34.9 (27.8-43.0) <sup>c</sup>   |
|                         | LFA-3  | 3.0 (1.0-12.0)         | 2.9 (1.0-13.0)                    | 2.2 (1.9-2.5)                   |

<sup>a</sup> Median and range

<sup>b</sup> p<0.05

<sup>c</sup> p<0.01

<sup>d</sup> p<0.001
